# Supplementary material
Source: publisher figshare collection journal article supplement (https://karger.figshare.com/ndownloader/files/14065379)
Supplement: Supplementary file 1 [file 14065379]

**Supplemental Table 2: Summary of single nucleotide polymorphisms (SNPs) and Minor Allele Frequency (MAF)**

| **Chr** | **rsID** | **Gene** | **EA-Minor Allele** | **AfAn-Minor Allele** | **EA**  **MAF** | **AfAn**  **MAF** | **Location** | **Function** |
| --- | --- | --- | --- | --- | --- | --- | --- | --- |
| 5 | rs641101 | *FGFR4* | A | G | 0.30 | 0.43 | upstream |  |
| 5 | rs1966265 | *FGFR4* | A | A | 0.25 | 0.06 | exonic |  |
| 5 | rs376618 | *FGFR4* | C | C | 0.24 | 0.32 | exonic | nonsynonymous SNV |
| 5 | rs351855 | *FGFR4* | A | A | 0.30 | 0.14 | exonic | synonymous SNV |
| 5 | rs31777 | *FGFR4* | C | C | 0.22 | 0.24 | intronic | nonsynonymous SNV |
| 12 | rs11063112 | *FGF23* | A | A | 0.26 | 0.09 | UTR3 |  |
| 12 | rs13312789 | *FGF23* | A | A | 0.10 | 0.06 | intronic |  |
| 13 | rs577912 | *KL* | T | T | 0.15 | 0.23 | intronic |  |
| 13 | rs1888057 | *KL* | T | T | 0.20 | 0.11 | intronic |  |

Abbreviations: Chr = chromosome, rsID = reference SNP ID number, EA= European Ancestry, AfAn= African Ancestry, MAF = minor allele frequency, UTR3 = untranslated 3 prime, SNV = Single Nucleotide Variant
